# Supplementary material
Source: PubMed Central journal article supplement (PMC4330771)
Supplement: pnas.1412058112.sapp.pdf [file pnas.1412058112.sapp.pdf]

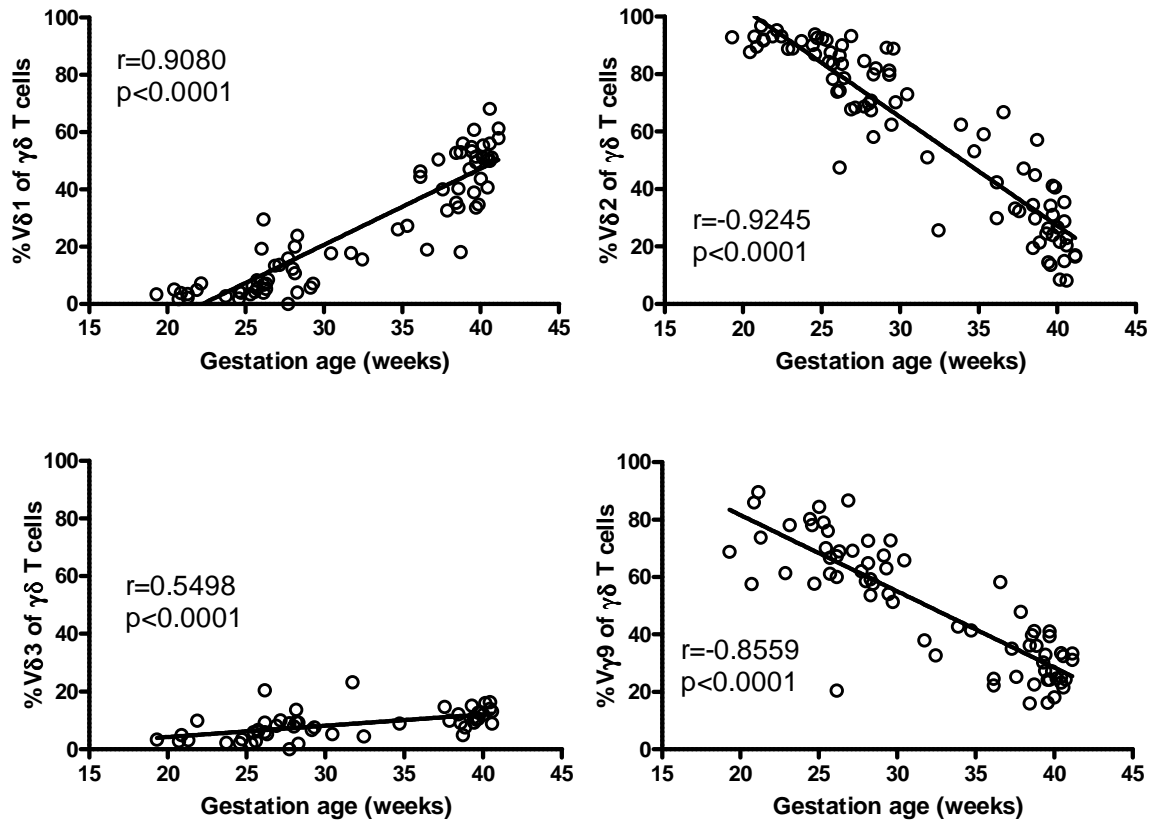

**Figure S1.** Percentages of  $\gamma\delta$  T cells positive for V $\delta$ 1, V $\delta$ 2, V $\delta$ 3 and V $\gamma$ 9 according to gestation age.

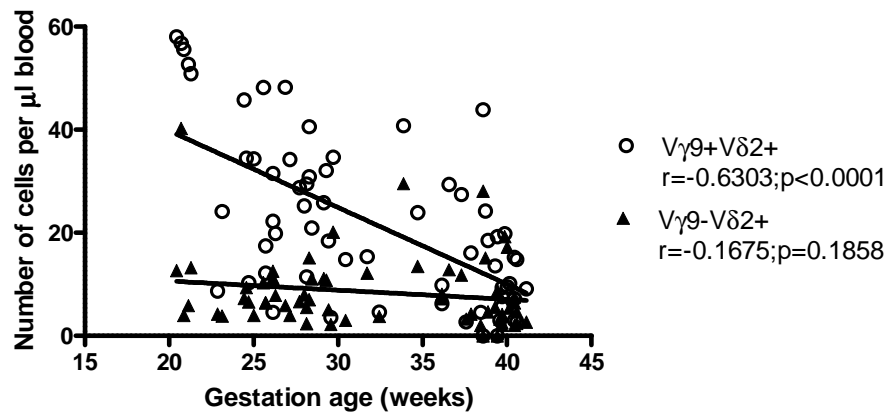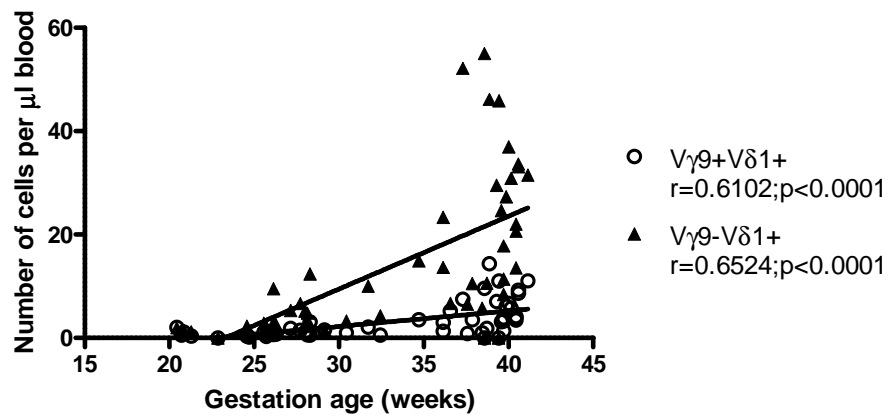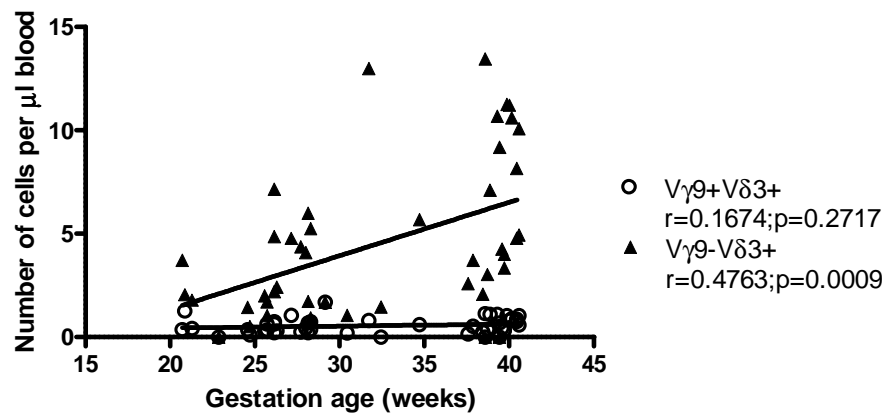

Figure S2. Absolute number counts of  $\gamma\delta$  T cell subsets according to gestation age.

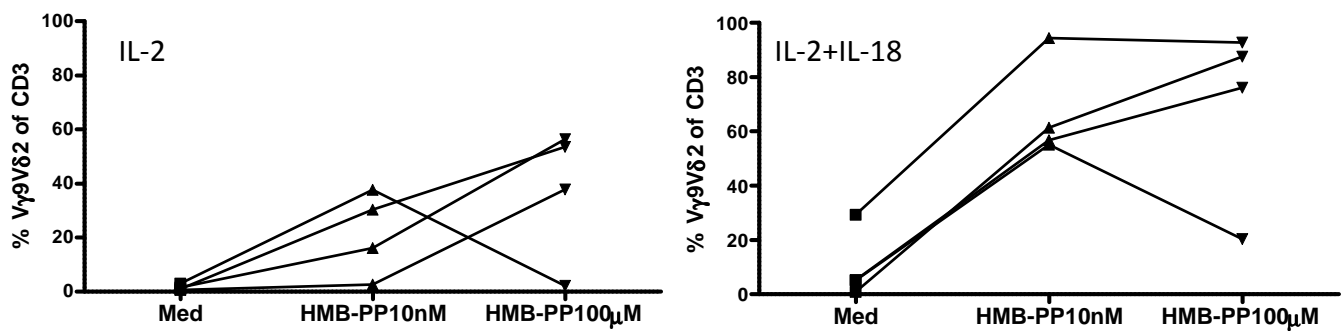

**Figure S3. Incubation with 100  $\mu$ M HMB-PP in the presence of IL-2+IL-18 results in the highest expansion of fetal V $\gamma$ 9V $\delta$ 2 T cells.** Fetal PBMC (<30 weeks of gestation) were cultured for 10 days with HMB-PP (10 nM or 100  $\mu$ M) in the presence of IL-2 (left panel) or in the presence of IL-2+IL-18 (right panel). Each line represents data obtained from one fetal sample.

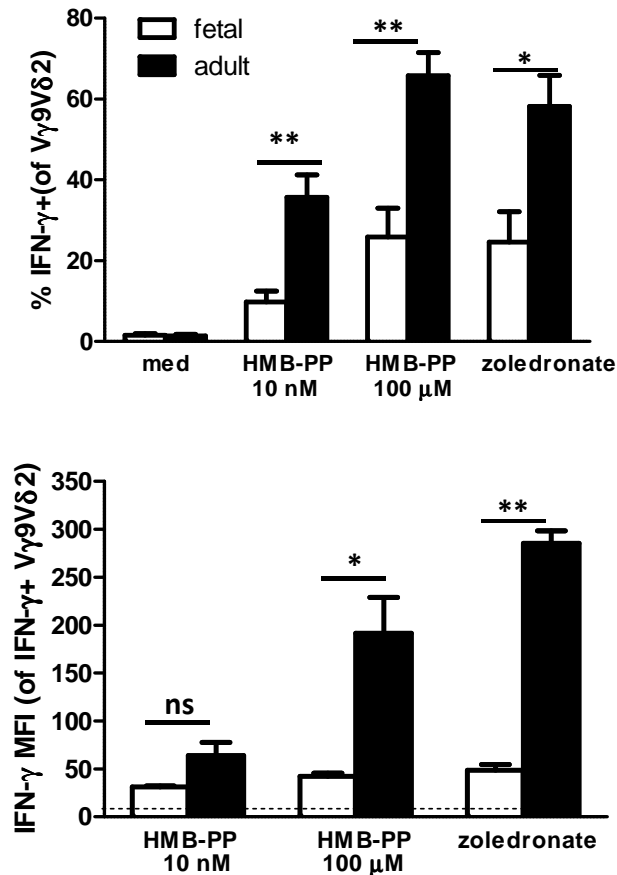

**Figure S4. HMB-PP and zoledronate can induce IFN- $\gamma$  production in fetal V $\gamma$ 9V $\delta$ 2 T cells but significantly less than in adult V $\gamma$ 9V $\delta$ 2 T cells.** Fetal (<30 weeks of gestation) and adult PBMC were stimulated for 3 days with HMB-PP and zoledronate in the presence of IL-2. Top panel: percentage of V $\gamma$ 9V $\delta$ 2 T cells positive for IFN- $\gamma$  (fetal: n=5, adult: n=6); bottom panel: MFI of IFN- $\gamma$  from the IFN- $\gamma$  positive V $\gamma$ 9V $\delta$ 2 T cells (fetal and adult: n=3). The total MFI for IFN- $\gamma$  in the medium control was around 8, as indicated by the dashed line. Gate was put on CD3+ $\gamma$  $\delta$ +V $\gamma$ 9+V $\delta$ 2+ cells; IFN- $\gamma$  induction was only observed in the V $\gamma$ 9V $\delta$ 2 T cell subset. Mean values with SEM are shown.

**Table S1A. Primer sequences used for spectratyping and sequencing**  
5'-3'

|                                   |                               |
|-----------------------------------|-------------------------------|
| Cδ                                | GTAGAATTCCTCACCAG-ACAAG       |
| Vδ1                               | CTGTCAACTTCAAGAAA-GCAGCGAAATC |
| Vδ2                               | ATACCGAGAAAAG GACATCTATG      |
| Vδ3                               | GTACCGGATAAGGCCAGATTA         |
| Cγ                                | CAAGAA GACAAAGGTATGTTCCAG     |
| Vγ2                               | GCAAGCACAAAGGAASAAC TTGAG     |
| Vγ3                               | GTACTATGACGTCTCCACCG          |
| Vγ4                               | ATGACTCCTACACCTCCAGC          |
| Vγ5/3                             | CCCAGGAGGTGGAGCTGGAT          |
| Vγ9                               | ATCAACGCTGGCAGTCC             |
| Run-off reaction (spectratyping): |                               |
| Cδ-FAM                            | ACGGATGGTTTGGTATGAG GCTGA     |
| Cγ-FAM                            | AATAGTGGGCTTGGGGAAAC          |

**Table S1B. Primer sequences used to quantify gene expression within sorted fetal blood Vγ9Vδ2 and αβ T cells**  
5'-3'

|               |                                   |
|---------------|-----------------------------------|
| GZMA-F        | ATT-CTT-GGG-GCT-CAC-TCA-ATA-AC    |
| GZMA-R        | GGG-TCA-TAG-CAT-GGA-TAG-GGA-AA    |
| GZMB-F        | CCC-TGG-GAA-AAC-ACT-CAC-ACA       |
| GZMB-R        | GCA-CAA-CTC-AAT-GGT-ACT-GTC-G     |
| GZMH-F        | CTG-GCT-GGG-GTT-ATG-TCT-CAA       |
| GZMH-R        | GGC-TAC-GTC-CTT-ACA-CAC-GAG       |
| GZMK-F        | GGG-GCT-TAT-ATG-ACT-CAT-GTG-TG    |
| GZMK-R        | GTG-GAT-CAA-TCA-GAA-CAC-CTC-C     |
| GZMM-F        | ACA-CCC-GCA-TGT-GTA-ACA-ACA       |
| GZMM-R        | GGA-GGC-TTG-AAG-ATG-TCA-GTG       |
| IFNG-F        | TCG-GTA-ACT-GAC-TTG-AAT-GTC-CA    |
| IFNG-R        | TCG-CTT-CCC-TGT-TTT-AGC-TGC       |
| IL2-F         | AAC-TCC-TGT-CTT-GCA-TTG-CAC       |
| IL2-R         | GCT-CCA-GTT-GTA-GCT-GTG-TTT       |
| TNFA-F        | CCT-CTC-TCT-AAT-CAG-CCC-TCT-G     |
| TNFA-R        | GAG-GAC-CTG-GGA-GTA-GAT-GAG       |
| IL4-F         | CCA-ACT-GCT-TCC-CCC-TCT-G         |
| IL4-R         | TCT-GTT-ACG-GTC-AAC-TCG-GTG       |
| IL17A-F       | AGA-TTA-CTA-CAA-CCG-ATC-CAC-CT    |
| IL17A-R       | GGG-GAC-AGA-GTT-CAT-GTG-GTA       |
| Tbet-F        | TTG-AGG-TGA-ACG-ACG-GAG-AG        |
| Tbet-R        | CCA-AGG-AAT-TGA-CAG-TTG-GGT       |
| eomes-F       | GTG-CCC-ACG-TCT-ACC-TGT-G         |
| eomes-R       | CCT-GCC-CTG-TTT-CGT-AAT-GAT       |
| Runx3-F       | AGC-ACC-ACA-AGC-CAC-TTC-AG        |
| Runx3-R       | GGG-AAG-GAG-CGG-TCA-AAC-TG        |
| PLZF-F        | GAA-GCG-GTT-CCT-GGA-TAG-TTT-G     |
| PLZF-R        | CAC-CGC-ACT-GAT-CAC-AGA-CAA       |
| IL18RAP-F     | CTG-GAT-TGA-AAT-AGT-GCT-GCT-GTA-C |
| IL18RAP-R     | TGC-ATA-GGA-TAC-GAA-AGC-ATC-AAA   |
| NKp30-F       | TGG-ATT-CTA-TGC-TGT-CAG-CTT-TCT   |
| NKp30-R       | GGT-CAG-ACA-TTT-GCC-CTG-GTA       |
| perforin-F    | GAC-TGC-CTG-ACT-GTC-GAG-G         |
| perforin-R    | TCC-CGG-TAG-GTT-TGG-TGG-AA        |
| CCR5-F        | TTC-TGG-GCT-CCC-TAC-AAC-ATT       |
| CCR5-R        | TTG-GTC-CAA-CCT-GTT-AGA-GCT-A     |
| CXCR3-F       | CCA-CCT-AGC-TGT-AGC-AGA-CAC       |
| CXCR3-R       | AGG-GCT-CCT-GCG-TAG-AAG-TT        |
| CCR7-F        | TGA-GGT-CAC-GGA-CGA-TTA-CAT       |
| CCR7-R        | GTA-GGC-CCA-CGA-AAC-AAA-TGA-T     |
| cyclophilin-F | TGC-TGG-ACC-CAA-CAC-AAA-TG        |
| cyclophilin-R | TGC-CAT-CCA-ACC-ACT-CAG-TCT       |
| actin-F       | CCC-AGC-CAT-GTA-CGT-TGC-TA        |
| actin-R       | TCA-CCG-GAG-TCC-ATC-ACG-AT        |



(Table S2, continued)

| Panel           | Row  | Date                               | Sequence                               | Panel  | Row                                         | Date | Sequence         | Panel            | Row | Date           | Sequence         |      |                  |
|-----------------|------|------------------------------------|----------------------------------------|--------|---------------------------------------------|------|------------------|------------------|-----|----------------|------------------|------|------------------|
| GD-006<br>29w0d | 10   | 1/16                               | tgt gcc ttg tgg gag gtg<br>C A L W E V | c<br>P | 10                                          | 1/16 | atg tgc a<br>L C | c<br>P           | 10  | 1/16           | atg tgc a<br>L C |      |                  |
|                 | 11   | 1/16                               | tgt gcc ttg tgg ga<br>C A L W E V      |        |                                             | 11   | 1/16             |                  |     | g<br>D         | 11               | 1/16 | atg tgc a<br>L C |
|                 | 11   | 1/16                               | tgt gcc ttg tgg gag<br>C A L W E       |        |                                             | 11   | 1/16             |                  |     | g<br>V         | 11               | 1/16 | atg tgc a<br>L C |
|                 | 12   | 1/16                               | tgt gcc ttg tgg gag gtg<br>C A L W E V |        |                                             | 11   | 1/16             |                  |     | g<br>V         | 11               | 1/16 | atg tgc a<br>L C |
|                 | 12   | 1/16                               | tgt gcc ttg tgg gag gtg<br>C A L W E V |        |                                             | 12   | 1/18             |                  |     | gtc aat<br>V N | 12               | 1/18 | atg tgc a<br>L C |
|                 | 13   | 1/16                               | tgt gcc ttg tgg gag<br>C A L W E       |        |                                             | 13   | 3/18             |                  |     | gg<br>R        | 13               | 3/18 | atg tgc a<br>L C |
|                 | 13   | 1/16                               | tgt gcc ttg tgg gag<br>C A L W E       |        |                                             | 14   | 5/18             |                  |     | cac<br>H       | 14               | 5/18 | atg tgc a<br>L C |
|                 | 14   | 6/16                               | tgt gcc ttg tgg gag gtg<br>C A L W E V |        |                                             | 14   | 1/18             |                  |     | t at<br>M      | 14               | 1/18 | atg tgc a<br>L C |
|                 | 14   | 1/16                               | tgt gcc ttg tgg gag gtg<br>C A L W E V |        |                                             | 14   | 1/18             |                  |     | cc<br>P        | 14               | 1/18 | atg tgc a<br>L C |
|                 | 14   | 1/16                               | tgt gc<br>C A                          |        |                                             | 14   | 1/18             |                  |     | ga<br>E        | 14               | 1/18 | atg tgc a<br>L C |
| 15              | 1/16 | tgt gcc ttg tgg gag<br>C A L W E   | 16                                     | 1/18   | gt cga tat tcc tat acc acg<br>G R Y S Y T T | 16   | 1/18             | atg tgc a<br>L C |     |                |                  |      |                  |
| GD-012<br>30w3d | 9    | 1/18                               | tgt gcc ttg tgg<br>C A L W             | c<br>P | 9                                           | 1/18 | atg tgc a<br>L C | c<br>P           | 9   | 1/18           | atg tgc a<br>L C |      |                  |
|                 | 10   | 1/18                               | tgt gcc ttg tgg gag gtg<br>C A L W E V |        |                                             | 10   | 1/18             |                  |     | g<br>D         | 10               | 1/18 | atg tgc a<br>L C |
|                 | 10   | 1/18                               | tgt gcc ttg tgg g<br>C A L W           |        |                                             | 10   | 1/18             |                  |     | g<br>V         | 10               | 1/18 | atg tgc a<br>L C |
|                 | 10   | 1/18                               | tgt gcc ttg tgg<br>C A L W             |        |                                             | 10   | 1/18             |                  |     | gtc aat<br>V N | 10               | 1/18 | atg tgc a<br>L C |
|                 | 11   | 1/18                               | tgt gcc ttg tgg gag gtg<br>C A L W E V |        |                                             | 11   | 1/18             |                  |     | gg<br>R        | 11               | 1/18 | atg tgc a<br>L C |
|                 | 13   | 3/18                               | tgt gcc ttg tgg gag<br>C A L W E       |        |                                             | 13   | 3/18             |                  |     | gg<br>R        | 13               | 3/18 | atg tgc a<br>L C |
|                 | 14   | 5/18                               | tgt gcc ttg tgg gag gtg<br>C A L W E V |        |                                             | 14   | 5/18             |                  |     | cac<br>H       | 14               | 5/18 | atg tgc a<br>L C |
|                 | 14   | 1/18                               | tgt gcc ttg tgg gag gtg<br>C A L W E V |        |                                             | 14   | 1/18             |                  |     | t at<br>M      | 14               | 1/18 | atg tgc a<br>L C |
|                 | 14   | 1/18                               | tgt gcc ttg tgg gag gtg<br>C A L W E V |        |                                             | 14   | 1/18             |                  |     | cc<br>P        | 14               | 1/18 | atg tgc a<br>L C |
|                 | 14   | 1/18                               | tgt gcc ttg tgg<br>C A L W             |        |                                             | 14   | 1/18             |                  |     | ga<br>E        | 14               | 1/18 | atg tgc a<br>L C |
| 16              | 1/18 | tgt gcc ttg tgg gag g<br>C A L W E | 16                                     | 1/18   | gt cga tat tcc tat acc acg<br>G R Y S Y T T | 16   | 1/18             | atg tgc a<br>L C |     |                |                  |      |                  |

Grey shading indicates the highly enriched public/invariant CDR3y9 CALWEVQELGKKIKVF sequence.

**Table S3**  
**Sequencing data of the CDR3y9 of sorted V $\gamma$ 9V $\delta$ 2  $\gamma\delta$  T cells and nonV $\gamma$ 9V $\delta$ 2  $\gamma\delta$  T cells from peripheral blood**  
**of three different fetuses before 30 weeks of gestation**

|                                    | CDR3g9 length (aa) | Freq.             | 3'V-REGION        | P3'V           | N-REGION        | P5'J                    | 5'J-REGION                       | JUNCTION (aa)      | J-GENE         |
|------------------------------------|--------------------|-------------------|-------------------|----------------|-----------------|-------------------------|----------------------------------|--------------------|----------------|
| GD-018 V $\gamma$ 9V $\delta$ 2    | 9                  | 1/10              | tgtgccttgaggaggt  |                | cc              |                         | ggttcaagatatt                    | CALWEVRFKIF        | TRGJP1         |
|                                    | 11                 | 1/10              | tgtgccttgaggag    |                |                 |                         | ttggc caaaaaatcaaggtatt          | CALWELGKKIKVF      | TRGJP          |
|                                    | 12                 | 1/10              | tgtgccttgaggaggtg |                | aa              |                         | gaattataagaactctt                | CALWEVKNYKKLF      | TRGJ1          |
|                                    | 13                 | 1/10              | tgtgccttgaggag    |                | aag             |                         | gagttggc caaaaaatcaaggtatt       | CALWEKELGKKIKVF    | TRGJP          |
|                                    | 13                 | 1/10              | tgtgccttgaggag    |                |                 |                         | aagagttggc caaaaaatcaaggtatt     | CALWEEELGKKIKVF    | TRGJP          |
|                                    | 14                 | 5/10              | tgtgccttgaggaggtg |                |                 |                         | caagagttggc caaaaaatcaaggtatt    | CALWEVQELGKKIKVF   | TRGJP          |
|                                    | out of frame       |                   | tgtgccttgaggag    |                | gggggaagtgggc   |                         | aaaaaatcaaggtatt                 | CALWEGGKLGKKSRY    | TRGJP          |
| GD-018 nonV $\gamma$ 9V $\delta$ 2 | 9                  | 1/13              | tgtgccttgaggag    |                | ag              |                         | tataagaactctt                    | CALWEEYKFLF        | TRGJ1          |
|                                    | 10                 | 1/13              | tgtgccttgagg      |                |                 |                         | aattataagaactctt                 | CALWNYKKLF         | TRGJ1          |
|                                    | 10                 | 1/13              | tgtgccttgaggaggtg |                |                 |                         | tattataagaactctt                 | CALWEVYKFLF        | TRGJ1 or TRGJ2 |
|                                    | 14                 | 1/13              | tgtgccttgaggaggtg |                | agg             |                         | gagttggc caaaaaatcaaggtatt       | CALWEVRELGKKIKVF   | TRGJP          |
|                                    | 14                 | 1/13              | tgtgccttgaggaggtg |                | agg             |                         | gagttggc caaaaaatcaaggtatt       | CALWEVRELGKKIKVF   | TRGJP          |
|                                    | 14                 | 1/13              | tgtgccttgaggaggtg |                | agggagttggccaag |                         | aaaaatcaaggtatt                  | CALWEVRELGKKIKVF   | TRGJP          |
|                                    | 14                 | 1/13              | tgtgccttgagg      |                | cga             |                         | ggccaagagttggc caaaaaatcaaggtatt | CALWARQELGKKIKVF   | TRGJP          |
|                                    | 14                 | 1/13              | tgtgccttgagg      |                | cga             |                         | ggccaagagttggc caaaaaatcaaggtatt | CALWARQELGKKIKVF   | TRGJP          |
|                                    | 14                 | 1/13              | tgtgccttgagg      |                | cga             |                         | ggccaagagttggc caaaaaatcaaggtatt | CALWARQELGKKIKVF   | TRGJP          |
|                                    | 14                 | 1/13              | tgtgccttgagg      |                | aatcaagt        |                         | agagttggc caaaaaatcaaggtatt      | CALWENQVELGKKIKVF  | TRGJP          |
|                                    | 15                 | 2/13              | tgtgccttgaggag    |                | caagagttggcca   |                         | aaaaaatcaaggtatt                 | CALQELGKKNQGI      | TRGJP          |
|                                    |                    | out of frame      |                   | tgtgccttgaggag |                 |                         | taccactggtggttcaagatatt          | CALWEYHVLVQDI      | TRGJP1         |
| GD-019 V $\gamma$ 9V $\delta$ 2    | 11                 | 2/8               | tgtgccttgaggaggt  |                | ctc             |                         | ttattataagaactctt                | CALWEVSYYKFLF      | TRGJ1          |
|                                    | 12                 | 1/8               | tgtgccttgaggag    |                |                 | t                       | ataccactggtggttcaagatatt         | CALWEYTTGWFKIF     | TRGJP1         |
|                                    | 13                 | 1/8               | tgtgccttgaggag    |                |                 |                         | caagagttggc caaaaaatcaaggtatt    | CALWEQELGKKIKVF    | TRGJP          |
|                                    | 14                 | 2/8               | tgtgccttgaggaggtg |                |                 |                         | caagagttggc caaaaaatcaaggtatt    | CALWEVQELGKKIKVF   | TRGJP          |
|                                    | 14                 | 1/8               | tgtgccttgaggaggtg | c              | g               |                         | agagttggc caaaaaatcaaggtatt      | CALWEVRELGKKIKVF   | TRGJP          |
|                                    | 15                 | 1/8               | tgtgccttgaggag    |                | ccagga          |                         | caagagttggc caaaaaatcaaggtatt    | CALWEPQELGKKIKVF   | TRGJP          |
| GD-019 nonV $\gamma$ 9V $\delta$ 2 | 9                  | 1/8               | tgtgccttgaggag    |                | cctgg           |                         | ataagaactctt                     | CALWDLDKLFLF       | TRGJ1 or TRGJ2 |
|                                    | 10                 | 1/8               | tgtgccttgaggaggt  |                | aa              |                         | attataagaactctt                  | CALWEVNYKFLF       | TRGJ1 or TRGJ2 |
|                                    | 16                 | 1/8               | tgtgccttgaggaggt  |                | tgggccc         |                         | caagagttggc caaaaaatcaaggtatt    | CALWEVGPQELGKKIKVF | TRGJP          |
|                                    | out of frame       |                   | tgtgccttgaggag    |                | g               |                         | agtagtattggtatcaagacgtt          | CALWEGVIGSRR       | TRGJP2         |
|                                    | out of frame       |                   | tgtgccttgaggaggtg | c              | gatgcaa         |                         | tattataagaactctt                 | CALWEVRCNIIRNS     | TRGJ1          |
|                                    | out of frame       |                   | tgtgccttgaggaggtg |                | cgcaacctc       | at                      | ataccactggtggttcaagatatt         | CALWEAQPHIPLVGSRY  | TRGJP1         |
| out of frame                       |                    | tgtgccttgaggag    |                   | acgcccacttc    |                 | aattataagaactctt        | CALWETPKLSIIIRNS                 | TRGJ1              |                |
| out of frame                       |                    | tgtgccttgaggaggtg |                   | g              |                 | agtagtattggtatcaagacgtt | CALWEGVIGSRR                     | TRGJP2             |                |
| GD-023 V $\gamma$ 9V $\delta$ 2    | 11                 | 1/7               | tgtgccttgaggag    |                |                 |                         | ttggc caaaaaatcaaggtatt          | CALWELGKKIKVF      | TRGJP          |
|                                    | 13                 | 1/7               | tgtgccttgaggaggtg |                |                 |                         | gagttggc caaaaaatcaaggtatt       | CALWEVELGKKIKVF    | TRGJP          |
|                                    | 13                 | 1/7               | tgtgccttgaggaggt  |                |                 |                         | agagttggc caaaaaatcaaggtatt      | CALWEVELGKKIKVF    | TRGJP          |
|                                    | 13                 | 1/7               | tgtgccttgaggag    |                |                 |                         | caagagttggc caaaaaatcaaggtatt    | CALWEQELGKKIKVF    | TRGJP          |
|                                    | 14                 | 1/7               | tgtgccttgaggaggtg |                | atcgg           |                         | gtggc caaaaaatcaaggtatt          | CALWEVIGLGGKIKVF   | TRGJP          |
|                                    | 14                 | 2/7               | tgtgccttgaggaggtg |                |                 |                         | caagagttggc caaaaaatcaaggtatt    | CALWEVQELGKKIKVF   | TRGJP          |
|                                    | out of frame       |                   | tgtgccttgaggag    |                | caagagttggcca   |                         | aaaaaatcaaggtatt                 | CALWEQELGKKNQGI    | TRGJP          |
| GD-023 nonV $\gamma$ 9V $\delta$ 2 | 11                 | 1/10              | tgtgccttgaggaggtg |                | agg             |                         | tattataagaactctt                 | CALWEVRYKFLF       | TRGJ2          |
|                                    | 11                 | 1/10              | tgtgcct           |                |                 |                         | ggccaagagttggc caaaaaatcaaggtatt | CAWQELGKKIKVF      | TRGJP          |
|                                    | 12                 | 2/10              | tgtgccttgaggaggtg |                | agaggc          |                         | tattataagaactctt                 | CALWEVRYKFLF       | TRGJ1          |
|                                    | 12                 | 2/10              | tgtgccttgaggaggtg | ca             |                 |                         | tagtgattggtatcaagacgtt           | CALWEVHSDWIKTF     | TRGJP2         |
|                                    | 15                 | 2/10              | tgtgccttgaggag    |                | ccatt           |                         | gcaagagttggc caaaaaatcaaggtatt   | CALWEPLQELGKKIKVF  | TRGJP          |
|                                    | 16                 | 2/10              | tgtgccttgaggaggtg | ca             | gacggaga        |                         | agttggc caaaaaatcaaggtatt        | CALWEVQTEKLGKIKVF  | TRGJP          |
|                                    | out of frame       |                   | tgtgccttgaggag    |                | tg              |                         | aagagttggc caaaaaatcaaggtatt     | CALWE*RVGQKNQGI    | TRGJP          |
|                                    | out of frame       |                   | tgtgccttgaggaggtg |                | acca            |                         | aagaactctt                       | CALWEVTKETL        | TRGJ1 or TRGJ2 |
|                                    | out of frame       |                   | tgtgccttgaggaggtg |                | acca            |                         | aagaactctt                       | CALWEVTKETL        | TRGJ1 or TRGJ2 |
|                                    | out of frame       |                   | tgtgccttgaggaggtg |                | acca            |                         | aagaactctt                       | CALWEVTKETL        | TRGJ1 or TRGJ2 |
|                                    | out of frame       |                   | tgtgccttgaggaggtg |                | acca            |                         | aagaactctt                       | CALWEVTKETL        | TRGJ1 or TRGJ2 |

Grey shading: public/invariant CDR3y9 sequence CALWEVQELGKKIKVF



**Table S4**  
**Sequencing data of the CDR3<sub>γ9</sub> of three different fetuses (< 30 weeks gestation) before (ex-vivo) and after**  
**HMB-PP-induced proliferation**

|                                                                       | CDR3 length (aa)                                                      | Freq.        | 3'V-REGION      | P3'V         | N-REGION      | P5'J                       | 5'-J-REGION                   | JUNCTION (aa)     | J-GENE       |       |
|-----------------------------------------------------------------------|-----------------------------------------------------------------------|--------------|-----------------|--------------|---------------|----------------------------|-------------------------------|-------------------|--------------|-------|
| <b>GD-002</b><br><b>Ex-vivo</b>                                       | 9                                                                     | 1/18         | tggtccttgaggagg |              | ggatg         |                            | gaaactctt                     | CALWEVGVKLF       | TRGJ1        |       |
|                                                                       | 10                                                                    | 2/18         | tggtccttg       |              | ctgtg         |                            | cactggttggtcaagatatt          | CALRVGTGWFKIF     | TRGJP1       |       |
|                                                                       | 11                                                                    | 1/18         | tggtccttg       |              |               |                            | agagttggccaaaaaatcaaggtatt    | CAL*ELGKKIKVF     | TRGJP        |       |
|                                                                       | 12                                                                    | 1/18         | tggtccttgagg    |              | ccttca        |                            | aattataagaactctt              | CALWEPSNYKKLF     | TRGJ2        |       |
|                                                                       | 12                                                                    | 1/18         | tggtccttg       |              | caagagtgggcag |                            | aaaaatcaaggtatt               | CALWQELGRKIKVF    | TRGJP        |       |
|                                                                       | 13                                                                    | 1/18         | tggtccttgagg    |              |               |                            | aagagtggccaaaaaatcaaggtatt    | CALWEEELGKKIKVF   | TRGJP        |       |
|                                                                       | 13                                                                    | 1/18         | tggtccttgagg    |              |               |                            | caagagtggccaaaaaatcaaggtatt   | CALWQELGKKIKVF    | TRGJP        |       |
|                                                                       | 13                                                                    | 1/18         | tggtccttgagg    | c            |               |                            | agttggccaaaaaatcaaggtatt      | CALWEVQLGKKIKVF   | TRGJP        |       |
|                                                                       | 13                                                                    | 1/18         | tggtccttgagg    |              |               |                            | gagttggccaaaaaatcaaggtatt     | CALWEVELGKKIKVF   | TRGJP        |       |
|                                                                       | 14                                                                    | 1/18         | tggtccttgagg    | c            | gg            |                            | gagttggccaaaaaatcaaggtatt     | CALWEVRELGKKIKVF  | TRGJP        |       |
|                                                                       | 14                                                                    | 5/18         | tggtccttgagg    |              |               |                            | caagagtggccaaaaaatcaaggtatt   | CALWEVQELGKKIKVF  | TRGJP        |       |
|                                                                       | 14                                                                    | 1/18         | tggtccttgagg    | ca           | ag            |                            | atacactggttcaagatatt          | CALWEVDTTGWFKIF   | TRGJP1       |       |
|                                                                       | 15                                                                    | 1/18         | tggtccttgagg    |              | ga            |                            | gcaagagtggccaaaaaatcaaggtatt  | CALWEVQELGKKIKVF  | TRGJP        |       |
|                                                                       | <b>GD-002</b><br><b>After HMB-PP-</b><br><b>induced proliferation</b> | 10           | 1/11            | tggtccttgagg |               | cgcg                       |                               | attataagaactctt   | CALWERDYKLF  | TRGJ1 |
|                                                                       |                                                                       | 11           | 1/11            | tggtccttgagg |               |                            |                               | aattataagaactctt  | CALWEVNYKKLF | TRGJ2 |
| 13                                                                    |                                                                       | 1/11         | tggtccttgagg    |              | t             |                            | gagttggccaaaaaatcaaggtatt     | CALWEVELGKKIKVF   | TRGJP        |       |
| 14                                                                    |                                                                       | 4/11         | tggtccttgagg    |              |               |                            | caagagtggccaaaaaatcaaggtatt   | CALWEVQELGKKIKVF  | TRGJP        |       |
| 14                                                                    |                                                                       | 1/11         | tggtccttgagg    |              | t             |                            | caagagtggccaaaaaatcaaggtatt   | CALWEVQELGKKIKVF  | TRGJP        |       |
| 14                                                                    |                                                                       | 1/11         | tggtccttgagg    | ca           | ggg           |                            | gtggccaaaaaatcaaggtatt        | CALWEVQELGKKIKVF  | TRGJP        |       |
| 15                                                                    |                                                                       | 1/11         | tggtccttgagg    | ca           | tac           |                            | agagttggccaaaaaatcaaggtatt    | CALWEVHTELGKKIKVF | TRGJP        |       |
| 15                                                                    |                                                                       | 1/11         | tggtccttgagg    | c            |               |                            | ggcaagagtggccaaaaaatcaaggtatt | CALWEVRELGKKIKVF  | TRGJP        |       |
| 15                                                                    |                                                                       | 1/11         | tggtccttgagg    |              | cccccc        |                            | caagagtggccaaaaaatcaaggtatt   | CALWEPPQELGKKIKVF | TRGJP        |       |
| <b>GD-011</b><br><b>Ex-vivo</b>                                       | 9                                                                     | 1/9          | tggtccttg       |              | ag            |                            | gaattataagaactctt             | CALRNYKKLF        | TRGJ2        |       |
|                                                                       | 10                                                                    | 1/9          | tggtccttgagg    |              | ctcg          |                            | attataagaactctt               | CALWEPDYKLF       | TRGJ1        |       |
|                                                                       | 11                                                                    | 1/9          | tggtccttg       |              | g             |                            | aagagtggccaaaaaatcaaggtatt    | CALWELGKKIKVF     | TRGJP        |       |
|                                                                       | 13                                                                    | 1/9          | tggtccttgagg    |              |               |                            | agagttggccaaaaaatcaaggtatt    | CALWEVELGKKIKVF   | TRGJP        |       |
|                                                                       | 13                                                                    | 1/9          | tggtccttgagg    |              | ca            |                            | caagagtggccaaaaaatcaaggtatt   | CALWAQELGKKIKVF   | TRGJP        |       |
|                                                                       | 14                                                                    | 3/9          | tggtccttgagg    |              |               |                            | caagagtggccaaaaaatcaaggtatt   | CALWEVQELGKKIKVF  | TRGJP        |       |
|                                                                       | 15                                                                    | 1/9          | tggtccttgagg    | ca           | ggg           |                            | agagttggccaaaaaatcaaggtatt    | CALWEVQELGKKIKVF  | TRGJP        |       |
| out of frame                                                          |                                                                       | tggtccttgagg |                 | agggtc       |               | aagaactctt                 | CALWEGSRNS                    | TRGJ1 or TRGJ2    |              |       |
| out of frame                                                          |                                                                       | tggtccttgagg |                 | tc           |               | aagaactctt                 | CALWDQETL                     | TRGJ1 or TRGJ2    |              |       |
| out of frame                                                          |                                                                       | tggtccttgagg | ca              | agag         |               | actctt                     | CALWEVQETL                    | TRGJ1 or TRGJ2    |              |       |
| <b>GD-011</b><br><b>After HMB-PP-</b><br><b>induced proliferation</b> | 12                                                                    | 1/11         | tggtccttgagg    |              | gt            |                            | gagttggccaaaaaatcaaggtatt     | CALWVQELGKKIKVF   | TRGJP        |       |
|                                                                       | 12                                                                    | 1/11         | tggtccttgagg    |              | a             |                            | aagagtggccaaaaaatcaaggtatt    | CALWVQELGKKIKVF   | TRGJP        |       |
|                                                                       | 12                                                                    | 1/11         | tggtccttgagg    |              |               |                            | agttggccaaaaaatcaaggtatt      | CALWEEELGKKIKVF   | TRGJP        |       |
|                                                                       | 13                                                                    | 1/11         | tggtccttgagg    |              |               |                            | aagagtggccaaaaaatcaaggtatt    | CALWEEELGKKIKVF   | TRGJP        |       |
|                                                                       | 14                                                                    | 4/11         | tggtccttgagg    |              |               |                            | caagagtggccaaaaaatcaaggtatt   | CALWEVQELGKKIKVF  | TRGJP        |       |
|                                                                       | 14                                                                    | 1/11         | tggtccttgagg    | ca           | g             |                            | gagttggccaaaaaatcaaggtatt     | CALWEVQELGKKIKVF  | TRGJP        |       |
|                                                                       | 14                                                                    | 1/11         | tggtccttgagg    |              | at            |                            | caagagtggccaaaaaatcaaggtatt   | CALWEDQELGKKIKVF  | TRGJP        |       |
| 14                                                                    | 1/11                                                                  | tggtccttgagg |                 | a            |               | aagagtggccaaaaaatcaaggtatt | CALWEVKELGKKIKVF              | TRGJP             |              |       |
| <b>GD-013</b><br><b>Ex-vivo</b>                                       | 11                                                                    | 1/12         | tggtccttgagg    |              |               |                            | laccactggttcaagatatt          | CALWDTTGWFKIF     | TRGJP1       |       |
|                                                                       | 11                                                                    | 1/12         | tggtccttgagg    | ca           | ggga          |                            | tataagaactctt                 | CALWEVQYKLF       | TRGJ1        |       |
|                                                                       | 11                                                                    | 1/12         | tggtccttgagg    | c            |               |                            | attataagaactctt               | CALWEVHYKKLF      | TRGJ1        |       |
|                                                                       | 12                                                                    | 1/12         | tggtccttgagg    |              |               |                            | caagagtggccaaaaaatcaaggtatt   | CALWQELGKKIKVF    | TRGJP        |       |
|                                                                       | 13                                                                    | 1/12         | tggtccttgagg    |              |               |                            | gagttggccaaaaaatcaaggtatt     | CALWEVELGKKIKVF   | TRGJP        |       |
|                                                                       | 14                                                                    | 6/12         | tggtccttgagg    |              |               |                            | caagagtggccaaaaaatcaaggtatt   | CALWEVQELGKKIKVF  | TRGJP        |       |
|                                                                       | 14                                                                    | 1/12         | tggtccttgagg    | c            | cc            |                            | gagttggccaaaaaatcaaggtatt     | CALWEVPELGGKIKVF  | TRGJP        |       |
|                                                                       | out of frame                                                          |              | tggtccttgagg    |              | agtggc        |                            | tcaaggtatt                    | CAL*VGQKSQGI      | TRGJP        |       |
| <b>GD-013</b><br><b>After HMB-PP-</b><br><b>induced proliferation</b> | 13                                                                    | 1/11         | tggtccttgagg    | c            |               |                            | agttggccaaaaaatcaaggtatt      | CALWEVQELGKKIKVF  | TRGJP        |       |
|                                                                       | 13                                                                    | 1/11         | tggtccttgagg    |              |               |                            | gagttggccaaaaaatcaaggtatt     | CALWEVELGKKIKVF   | TRGJP        |       |
|                                                                       | 14                                                                    | 6/11         | tggtccttgagg    |              |               |                            | caagagtggccaaaaaatcaaggtatt   | CALWEVQELGKKIKVF  | TRGJP        |       |
|                                                                       | 14                                                                    | 2/11         | tggtccttgagg    | c            | g             |                            | agagttggccaaaaaatcaaggtatt    | CALWEVRELGKKIKVF  | TRGJP        |       |
|                                                                       | 14                                                                    | 1/11         | tggtccttgagg    | c            | gg            |                            | gagttggccaaaaaatcaaggtatt     | CALWEVRELGKKIKVF  | TRGJP        |       |

Grey shading: public/invariant CDR3<sub>γ9</sub> sequence CALWEVQELGKKIKVF

**Table S5.** Percentages of activation (HLA-DR) and differentiation (CD27, CD28, CD45RO) markers, NKR (CD94, NKG2A, NKG2C, CD158, NKG2D, CD161 and KLRG1), granule-associated molecules (perforin, granzyme A, granzyme B, granzyme K and granulysin), chemokine receptors (CCR5, CCR6, CCR7, CCR9 and CX3CR1), transcription factors (T-bet and eomes) and cytokines (IFN- $\gamma$ , IL-2, TNF- $\alpha$  after 4h stimulation with PMA/ionomycin) on fetal blood  $\gamma\delta$  and  $\alpha\beta$  T cells at mid-gestation.

| Marker        | $\gamma\delta$ T cells - mean $\pm$ SD (min-max) | $\alpha\beta$ T cells - mean $\pm$ SD (min-max) | p value ( $\gamma\delta$ vs $\alpha\beta$ ), n |
|---------------|--------------------------------------------------|-------------------------------------------------|------------------------------------------------|
| HLA-DR        | 1.28 $\pm$ 0.82 (0.47-3.00)                      | 0.45 $\pm$ 0.26 (0.18-1.04)                     | p=0.031, n=9                                   |
| CD27-CD28-    | 0.58 $\pm$ 0.47 (0.00-1.22)                      | 0.80 $\pm$ 0.90 (0.04-2.05)                     | p>0.05, n=5                                    |
| CD45RO        | 32.13 $\pm$ 12.37 (18.04-55.60)                  | 9.04 $\pm$ 4.96 (5.00-19.68)                    | p<0.001, n=11                                  |
| Ki-67         | 15.02 $\pm$ 4.02 (8.40-22.03)                    | 11.83 $\pm$ 4.96 (4.70-21.00)                   | p=0.042, n=12                                  |
| CD94          | 9.22 $\pm$ 5.39 (3.07-19.11)                     | 0.29 $\pm$ 0.17 (0.10-0.56)                     | p<0.01, n=7                                    |
| NKG2A         | 18.03 $\pm$ 17.70(5.00-63.45)                    | 3.44 $\pm$ 5.86 (0.21-18.20)                    | p<0.01, n=10                                   |
| NKG2C         | 2.23 $\pm$ 2.19 (0.14-7.64)                      | 0.24 $\pm$ 0.10 (0.12-0.44)                     | p =0.016, n=10                                 |
| CD158a        | 6.14 $\pm$ 5.39 (1.55-16.70)                     | 0.64 $\pm$ 0.60 (0.09-1.85)                     | p<0.01, n=11                                   |
| CD158b        | 6.24 $\pm$ 5.93 (1.28-17.40)                     | 0.90 $\pm$ 0.68 (0.19-2.24)                     | p=0.013, n=11                                  |
| NKG2D         | 50.29 $\pm$ 19.80 (15-83.32)                     | 25.08 $\pm$ 14.18 (3.00-46.15)                  | p<0.001, n=10                                  |
| CD161         | 67.24 $\pm$ 9.55 (57.14-84.05)                   | 8.48 $\pm$ 3.16 (3.01-12.26)                    | p<0.001, n=6                                   |
| KLRG1         | 49.77 $\pm$ 15.41 (25.53-67.34)                  | 27.85 $\pm$ 14.29 (4.31-47.23)                  | p<0.001, n=8                                   |
| perforin      | 1.64 $\pm$ 0.86 (0.40-2.54)                      | 0.70 $\pm$ 0.77 (0.15-2.34)                     | p=0.029, n=7                                   |
| Granzyme A    | 47.75 $\pm$ 21.35 (11.73-94.15)                  | 2.61 $\pm$ 3.67 (0.44-14.25)                    | p<0.001, n=19                                  |
| Granzyme B    | 1.54 $\pm$ 0.90 (0.60-3.49)                      | 1.50 $\pm$ 2.01 (0.18-6.70)                     | p>0.05, n=11                                   |
| Granzyme K    | 45.35 $\pm$ 10.50 (29.97-61.61)                  | 1.71 $\pm$ 1.62 (0.39-4.03)                     | p<0.001, n=6                                   |
| Granulysin    | 1.17 $\pm$ 0.76 (0.10-2.56)                      | 1.07 $\pm$ 1.12 (0.13-4.00)                     | p>0.05, n=11                                   |
| CCR5          | 19.62 $\pm$ 8.15 (10.48-28.44)                   | 1.06 $\pm$ 0.89 (0.38-2.52)                     | p<0.01, n=5                                    |
| CCR6          | 12.40 $\pm$ 5.03 (6.44-18.51)                    | 2.87 $\pm$ 0.59 (2.26-3.63)                     | p=0.023, n=4                                   |
| CCR7          | 66.65 $\pm$ 4.13 (60.79-70.47)                   | 94.39 $\pm$ 2.48 (91.04-96.32)                  | p<0.01, n=4                                    |
| CCR9          | 4.36 $\pm$ 1.70 (2.25-6.40)                      | 0.90 $\pm$ 0.62 (0.34-1.77)                     | P<0.01, n=4                                    |
| CX3CR1        | 4.45 $\pm$ 2.46 (1.62-6.08)                      | 0.78 $\pm$ 0.45 (0.35-1.25)                     | P> 0.05, n=3                                   |
| T-bet         | 42.44 $\pm$ 10.72 (23.00-61.27)                  | 3.73 $\pm$ 4.65 (0.41-12.00)                    | p<0.001, n=12                                  |
| Eomes         | 45.35 $\pm$ 3.23 (41.87-51.86)                   | 6.97 $\pm$ 5.04 (0.48-17.20)                    | p<0.001, n=12                                  |
| IFN- $\gamma$ | 26.45 $\pm$ 5.44 (17.54-32.42)                   | 1.58 $\pm$ 2.01 (0.34-7.11)                     | p<0.001, n=10                                  |
| IL-2          | 7.39 $\pm$ 1.52 (5.19-9.50)                      | 32.66 $\pm$ 7.27 (20.61-40.35)                  | p<0.001, n=7                                   |
| TNF- $\alpha$ | 5.66 $\pm$ 4.12 (0.10-11.83)                     | 2.85 $\pm$ 1.65 (1.18-5.78)                     | p=0.051, n=6                                   |
| IL-4          | Not detected                                     | Not detected                                    |                                                |
| IL-17         | Not detected                                     | Not detected                                    |                                                |

**Table S6.** Gene expression analysis (microarray) of sorted fetal blood V $\gamma$ 9V $\delta$ 2 T cells and  $\alpha\beta$  T cells (<30 weeks of gestation).

| Symbol                                                           | Illumina ID  | M    | p          |  |
|------------------------------------------------------------------|--------------|------|------------|--|
| <b>Chemokines, cytokines and receptors</b>                       |              |      |            |  |
| IL18RAP                                                          | ILMN_1721762 | 2.47 | 0.0000001  |  |
| CCL5 (RANTES)                                                    | ILMN_1773352 | 1.84 | 0.0000001  |  |
| CXCR4                                                            | ILMN_1801584 | 1.22 | 0.0000439  |  |
| CXCR3                                                            | ILMN_1797975 | 0.86 | 0.0000299  |  |
| CD84 (SLAMF5)                                                    | ILMN_1698367 | 0.69 | 0.0005255  |  |
| CCR4                                                             | ILMN_2086143 | 0.62 | 0.0003042  |  |
| TGFB $\beta$ 3                                                   | ILMN_1784287 | 0.81 | 0.0000155  |  |
| EBI2                                                             | ILMN_1798706 | 0.71 | 0.0005299  |  |
| IFNG                                                             | ILMN_2207291 | 0.42 | 0.0007387  |  |
| <b>NK: receptors, signaling and granule-associated molecules</b> |              |      |            |  |
| GMP-17 (NKG7)                                                    | ILMN_1682993 | 2.74 | 0.0000005  |  |
| GZMK                                                             | ILMN_1710734 | 2.32 | 0.0000001  |  |
| S1PR5                                                            | ILMN_2073184 | 2.00 | 0.0000237  |  |
| KLRB1, CD161                                                     | ILMN_2079655 | 1.79 | <0.0000001 |  |
| PRF1                                                             | ILMN_1740633 | 1.51 | 0.0009307  |  |
| PIK3AP1                                                          | ILMN_1652787 | 1.40 | 0.0000061  |  |
| CST7 (cystatin F)                                                | ILMN_1679826 | 1.36 | 0.0000823  |  |
| STX11                                                            | ILMN_1720771 | 1.25 | 0.0000149  |  |
| ELF4 (MEF)                                                       | ILMN_1652082 | 1.22 | 0.0000025  |  |
| PILRB                                                            | ILMN_1768754 | 1.15 | 0.0003007  |  |
| PLCG2                                                            | ILMN_1815719 | 1.12 | 0.0000023  |  |
| NCR3 (NKp30)                                                     | ILMN_2044471 | 1.00 | 0.0000441  |  |
| HCST (DAP10)                                                     | ILMN_1699931 | 0.94 | 0.0000913  |  |
| PIK3R1 (p85; GRB1)                                               | ILMN_2398235 | 0.94 | 0.0003928  |  |
| PIK3CG                                                           | ILMN_1770433 | 0.86 | 0.0006724  |  |
| TYROBP (DAP12)                                                   | ILMN_1778977 | 0.84 | 0.0008443  |  |
| FCRL3                                                            | ILMN_1797428 | 0.84 | 0.0000429  |  |
| GZMA                                                             | ILMN_1779324 | 0.79 | 0.0006917  |  |
| FNBP1                                                            | ILMN_1797342 | 0.76 | 0.0001454  |  |
| TXNIP (VDUP1)                                                    | ILMN_1697448 | 0.69 | 0.0000386  |  |
| KLRG1                                                            | ILMN_2124920 | 0.67 | 0.0003379  |  |
| CD247 (CD3zeta)                                                  | ILMN_2377669 | 0.54 | 0.0001315  |  |
| FCRL3                                                            | ILMN_1699599 | 0.51 | 0.0004603  |  |
| GAB3                                                             | ILMN_1805979 | 0.45 | 0.0002846  |  |
| RAC2                                                             | ILMN_1709795 | 0.45 | 0.000586   |  |
| JAKMIP1 (Marlin 1)                                               | ILMN_1784141 | 0.40 | 0.0007327  |  |
| <b>Transcription factors</b>                                     |              |      |            |  |
| PLZF (ZBTB16)                                                    | ILMN_1750496 | 2.12 | <0.0000001 |  |
| BHLHB2 (STRA13)                                                  | ILMN_1768534 | 1.84 | 0.0000018  |  |
| NR4A2 (NURR1)                                                    | ILMN_2339955 | 1.36 | 0.0000025  |  |
| BHLHA38 (TWIST1)                                                 | ILMN_1672908 | 1.32 | 0.0010628  |  |
| MAF                                                              | ILMN_1719543 | 1.29 | 0.0000022  |  |
| NR4A3                                                            | ILMN_1807298 | 1.29 | 0.0002119  |  |
| FOSL2                                                            | ILMN_1725175 | 1.25 | 0.0000022  |  |
| MYBL1                                                            | ILMN_3241046 | 1.18 | 0.0007205  |  |
| FOXP4                                                            | ILMN_1773809 | 1.15 | 0.0001531  |  |
| LITAF                                                            | ILMN_1713934 | 0.92 | 0.0002150  |  |
| KLF4                                                             | ILMN_2137789 | 0.92 | 0.0000836  |  |
| JUNB                                                             | ILMN_2086077 | 0.86 | 0.0001723  |  |
| DDX3X (C/EBP delta)                                              | ILMN_1794392 | 0.84 | 0.0000454  |  |
| BZW1                                                             | ILMN_1793846 | 0.81 | 0.0000529  |  |
| HNRNPUL1                                                         | ILMN_3257430 | 0.81 | 0.0004457  |  |
| RUNX3                                                            | ILMN_1787461 | 0.79 | 0.0000287  |  |
| EGR1                                                             | ILMN_1762899 | 0.76 | 0.0006082  |  |
| KLF10                                                            | ILMN_1659122 | 0.74 | 0.0000611  |  |
| MAFF                                                             | ILMN_1680139 | 0.74 | 0.0004494  |  |
| REL                                                              | ILMN_2124064 | 0.74 | 0.0003637  |  |
| NFIL3                                                            | ILMN_1707312 | 0.64 | 0.0008908  |  |
| KLF2                                                             | ILMN_1735930 | 0.62 | 0.0007467  |  |
| KLF11                                                            | ILMN_1751656 | 0.62 | 0.0003109  |  |
| MYC                                                              | ILMN_1680618 | 0.60 | 0.0000732  |  |
| CDK9                                                             | ILMN_1747556 | 0.58 | 0.0002243  |  |
| HHEX                                                             | ILMN_1762712 | 0.56 | 0.0002216  |  |
| BZW1                                                             | ILMN_1704760 | 0.49 | 0.0009906  |  |
| MLL3                                                             | ILMN_2295183 | 0.47 | 0.0009164  |  |
| SERTAD2                                                          | ILMN_1651347 | 0.45 | 0.0005114  |  |
| <b>Adhesion</b>                                                  |              |      |            |  |
| ITGAM (CD11b)                                                    | ILMN_1685009 | 1.15 | 0.0000027  |  |
| CD97                                                             | ILMN_1676718 | 0.45 | 0.0002600  |  |
| AMICA1 (JAML)                                                    | ILMN_1778723 | 0.45 | 0.0004771  |  |

Lists of increased expressed genes in fetal blood V $\gamma$ 9V $\delta$ 2 T cells compared to fetal blood  $\alpha\beta$  T cells (same fetuses) related to 'chemokines, cytokines and their receptors', 'NK cells', 'transcription factors' and 'adhesion molecules'. M (log<sub>2</sub> fold change V $\gamma$ 9V $\delta$ 2/ $\alpha\beta$ ) reflects the differential expression of a gene. N= 4 fetuses.

■ : gene is also enriched in adult blood V $\gamma$ 9V $\delta$ 2 T cells compared to adult  $\alpha\beta$  T cells; based on Pont *et al* (1) comparing four sorted adult blood V $\gamma$ 9+ T cell samples (NCBI GEO data set under accession number GSE27291) with six sorted adult blood  $\alpha\beta$  T cell samples (GSE15659 and GSE8059).

**Table S7.** Gene expression data of 16 genes from sorted V $\gamma$ 9V $\delta$ 2 T cells compared to the expression within sorted  $\alpha\beta$  T cells derived from the same fetuses, as determined by real-time PCR.

| Gene          | Fetus        |        |        |        |
|---------------|--------------|--------|--------|--------|
|               | GD-018       | GD-019 | GD-020 | GD-023 |
| PLZF          | 5.28         | 4.65   | 2.89   | 3.04   |
| Foxp1         | -2.83        | -4.49  | -2.88  | -4.54  |
| T-bet         | 2.25         | 11.83  | 8.13   | 14.46  |
| Eomes         | 3.23         | 2.07   | 6.10   | 7.50   |
| Runx3         | 2.53         | 0.70   | 2.59   | 1.35   |
| IFN- $\gamma$ | 3.76         | -2.10  | 2.56   | 2.31   |
| IL-2          | 2.78         | -0.34  | -4.79  | -1.33  |
| TNF- $\alpha$ | 0.05         | -0.20  | -0.18  | -0.43  |
| IL18RAP       | 2.56         | 10.21  | 3.98   | 6.71   |
| NKp30         | 0.36         | 2.98   | 2.69   | 2.97   |
| perforin      | 2.83         | 1.03   | 2.38   | -0.03  |
| granzyme K    | 4.23         | 5.53   | 3.87   | 3.69   |
| granzyme A    | 2.38         | 1.58   | 2.11   | -0.64  |
| CCR5          | 13.06        | 7.92   | 7.08   | 10.82  |
| CXCR3         | 2.62         | 5.19   | 3.28   | 1.98   |
| CCR7          | -1.11        | -2.67  | -0.12  | -2.48  |
| IL-4          | not detected |        |        |        |
| IL-13         | not detected |        |        |        |
| IL-17         | not detected |        |        |        |

Data are expressed as log<sub>2</sub> of fold change V $\gamma$ 9V $\delta$ 2/ $\alpha\beta$  for each individual fetus.

**Table S8.** Gene expression data of selected genes from sorted V $\gamma$ 9V $\delta$ 2 T cells compared to the expression within sorted nonV $\gamma$ 9V $\delta$ 2  $\gamma\delta$  T cells derived from the same fetuses, as determined by real-time PCR.

| Gene       | Fetus  |        |        |        |
|------------|--------|--------|--------|--------|
|            | GD-018 | GD-019 | GD-020 | GD-023 |
| T-bet      | 4.97   | 1.44   | 5.64   | 3.32   |
| Eomes      | 13.27  | 5.10   | 8.43   | 1.50   |
| IL18RAP    | 3.86   | 1.87   | -0.31  | 2.24   |
| perforin   | 6.46   | 3.42   | 1.19   | -0.02  |
| granzyme K | 1.96   | 0.89   | 0.27   | 2.23   |
| granzyme A | 3.95   | 2.04   | 1.99   | 0.84   |
| CCR5       | -0.6   | 8.33   | 2.04   | 11.01  |
| CXCR3      | 1.37   | 1.16   | 1.15   | 1.36   |

Data are expressed as log<sub>2</sub> of fold change V $\gamma$ 9V $\delta$ 2/nonV $\gamma$ 9V $\delta$ 2 for each individual fetus.

**Table S9.** Comparison between gene expression enriched in adult (Pont *et al.*, (1)) and fetal (this study) V $\gamma$ 9V $\delta$ 2 T cells

| Pont et al: cytokine/receptor | This study      | Pont et al: NK cytotoxicity | This study     |
|-------------------------------|-----------------|-----------------------------|----------------|
| CCL3                          |                 | CASP3                       |                |
| CCL5, RANTES                  |                 | FASLG                       |                |
| CCR2                          |                 | FCGR3A                      |                |
| CCR5                          |                 | FCGR3B                      |                |
| CSF1                          |                 | GZMB                        |                |
| CXCL11                        |                 | IFNG                        |                |
| CXCL9                         |                 | KLRC1, NKG2A                |                |
| CXCR3                         |                 | KLRC2, NKG2C                |                |
| CXCR6                         |                 | KLRD1, CD94                 |                |
| FASL G                        |                 | KLRK1, NKG2D                |                |
| IFNG                          |                 | PIK3R3                      |                |
| IL12RB2                       |                 | PLCG2                       |                |
| IL15                          | M=0.40;p=0.005  | PRF1                        |                |
| IL18R1                        | M=0.40;p=0.021  | SHC4                        |                |
| IL23R                         |                 | TYROBP, DAP12               |                |
| IL2RA                         |                 | ULBP2                       |                |
| IL2RB                         | M=0.71;p=0.002  | NKG7                        |                |
| IL4                           |                 |                             |                |
| IL9R                          |                 | <b>Pont et al: Th1</b>      | This study     |
| LIF                           |                 | AUTS2                       |                |
| TNFRSF11A                     |                 | CCL3                        |                |
| TNFRSF12A                     |                 | CCL3L1                      |                |
| TNFRSF1B                      |                 | CCL5, RANTES                |                |
| TNFSF14                       | M=0.45;p=0.019  | CD38                        |                |
| TNFSF4                        |                 | CXCL9                       |                |
| TNFSF9                        |                 | CCR5                        |                |
|                               |                 | CXCR3                       |                |
| <b>Pont et al: Jak/STAT</b>   | This study      | DNAJC6                      |                |
| IFNG                          |                 | GOS2                        |                |
| IL12RB2                       |                 | GNLY                        |                |
| IL15                          | M=0.40;p=0.005  | GZMB                        |                |
| IL23R                         |                 | GZMH                        |                |
| IL2RA                         |                 | GZMK                        |                |
| IL2RB                         |                 | IFNG                        |                |
| IL4                           |                 | IL12RB2                     |                |
| IL9R                          |                 | IL18RAP                     |                |
| LIF                           |                 | IL18R1                      | M=0.40;p=0.021 |
| PIK3R3                        |                 | IRF8                        |                |
| SOCS1                         |                 | LRP8                        |                |
| STAT4                         | M=0.51; p=0.008 | PLAUR                       |                |
|                               |                 | PRF1                        |                |
|                               |                 | TNFRSF1B                    |                |

Tables are based on enriched genes in adult V $\gamma$ 9V $\delta$ 2 T cells vs adult  $\alpha\beta$  T cells by Pont *et al.* (1)

- :also enriched expression in fetal V $\gamma$ 9V $\delta$ 2 T cells vs fetal  $\alpha\beta$  T cells (as analyzed by microarray analysis and/or real-time PCR)
- :indication of enriched expression by microarray analysis (but not meeting the criteria of M>0.4 and p<0.001)

## References Appendix

1. Pont F, Familiades, J., Dejean, S., Fruchon, S., Cendron, D. *et al.* (2012) The gene expression profile of phosphoantigen-specific human gammadelta T lymphocytes is a blend of alphabeta T-cell and NK-cell signatures. *Eur. J. Immunol* 42(1):228-240.
